# Supplementary material for: Macrocyclic peptidomimetics as inhibitors of insulin-regulated aminopeptidase (IRAP)
Source: Royal Society of Chemistry journal article supplement (doi:10.1039/c9md00485h), 2020-01-01
Supplement: c9md00485h1.pdf [file c9md00485h1.pdf]

## Macrocyclic Peptidomimetics as Inhibitors of Insulin-Regulated Aminopeptidase (IRAP)

*Nicholas Barlow<sup>a,b</sup>, Sudarsana Reddy Vanga<sup>c</sup>, Jonas Sävmarker<sup>d</sup>, Anja Sandström<sup>d</sup>, Peta Burns<sup>e</sup>, Anders Hallberg<sup>a</sup>, Johan Åqvist<sup>c</sup>, Hugo Gutiérrez-de-Terán<sup>c</sup>, Mathias Hallberg<sup>g</sup>, Mats Larhed<sup>a,f</sup>, Siew Yeen Chai<sup>e</sup>, Philip E. Thompson<sup>b\*</sup>*

<sup>a</sup>Department of Medicinal Chemistry, BMC, Uppsala University, P.O. Box 574, SE-751 23 Uppsala, Sweden

<sup>b</sup>Medicinal Chemistry, Monash Institute of Pharmaceutical Sciences, Parkville, Victoria 3052, Australia

<sup>c</sup>Department of Cell and Molecular Biology, BMC, Box 596, Uppsala University, SE-751 24 Uppsala, Sweden

<sup>d</sup>The Beijer Laboratory, Department of Medicinal Chemistry, BMC, Uppsala University, P.O. Box 574, SE-751 23 Uppsala, Sweden

<sup>e</sup>Biomedicine Discovery Institute, Department of Physiology, Monash University, Clayton, Victoria 3800, Australia

<sup>g</sup>The Beijer Laboratory, Department of Pharmaceutical Biosciences, Division of Biological Research on Drug Dependence, BMC, Uppsala University, P.O. Box 591, SE-751 24 Uppsala, Sweden

<sup>f</sup>Science for Life Laboratory, Department of Medicinal Chemistry, Uppsala University, BMC, SE-751 24 Uppsala, Sweden

## Supplementary Information

### LCMS Purity Traces and HRMS for synthesised compounds

#### Compound 9

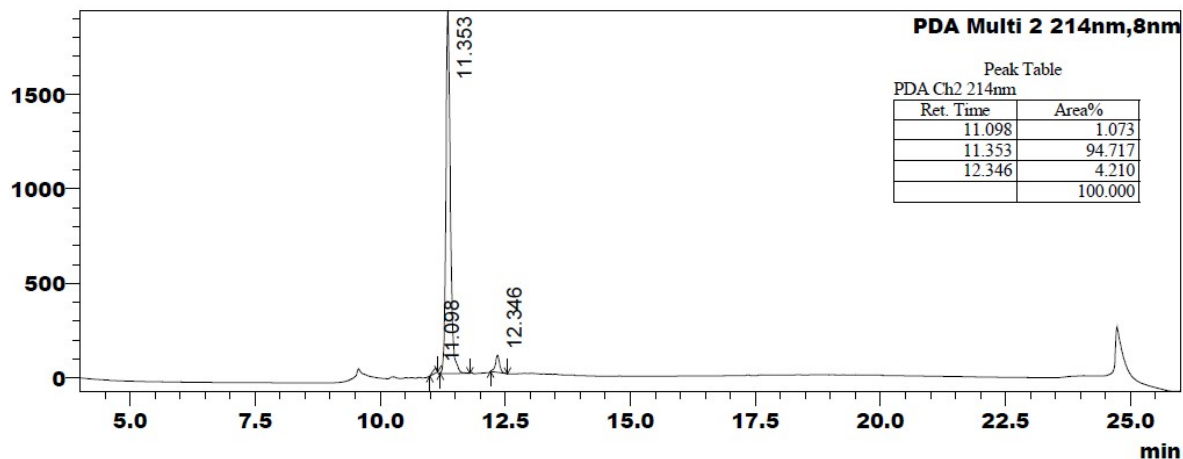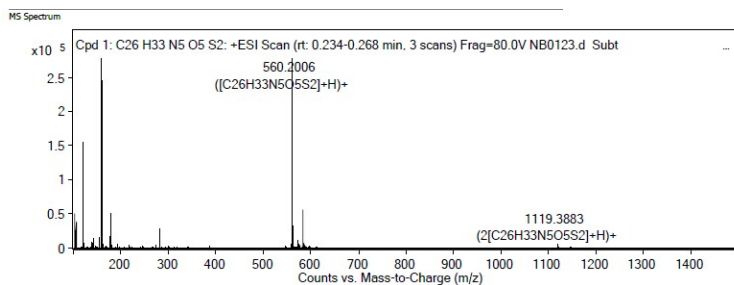

#### MS Spectrum Peak List

| m/z      | Calc m/z | Diff(ppm) | z | Abund     | Formula                                                                      | Ion                  |
|----------|----------|-----------|---|-----------|------------------------------------------------------------------------------|----------------------|
| 280.6037 | 280.6034 | -0.81     | 2 | 28766.27  | C <sub>26</sub> H <sub>33</sub> N <sub>5</sub> O <sub>5</sub> S <sub>2</sub> | (M+2H) <sup>2+</sup> |
| 560.2006 | 560.1996 | -1.77     | 1 | 278438.05 | C <sub>26</sub> H <sub>33</sub> N <sub>5</sub> O <sub>5</sub> S <sub>2</sub> | (M+H) <sup>+</sup>   |
| 582.1816 | 582.1815 | -0.07     | 1 | 57145.73  | C <sub>26</sub> H <sub>33</sub> N <sub>5</sub> O <sub>5</sub> S <sub>2</sub> | (M+Na) <sup>+</sup>  |

#### Compound 10

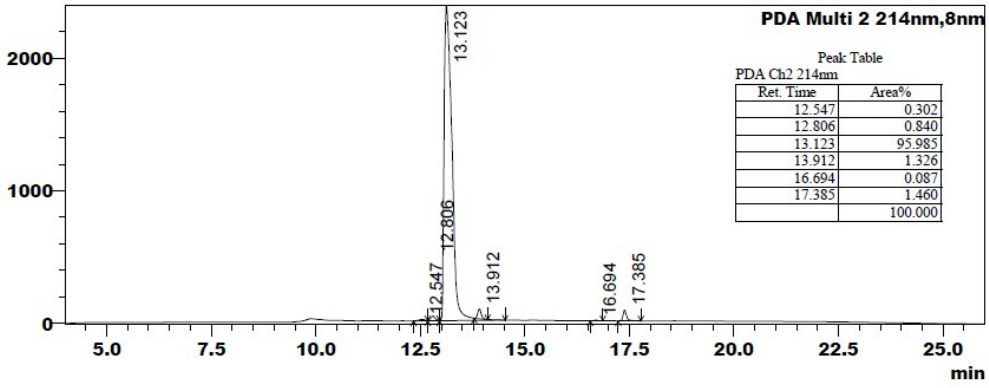

MS Spectrum

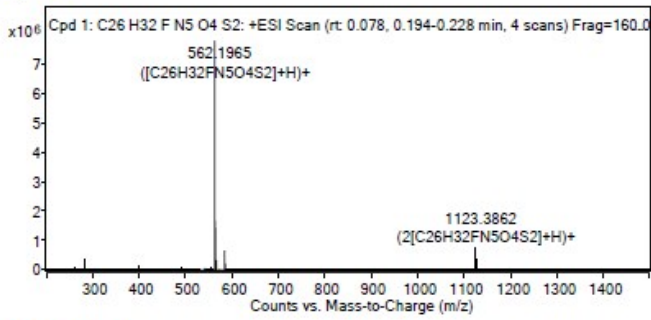

MS Zoomed Spectrum

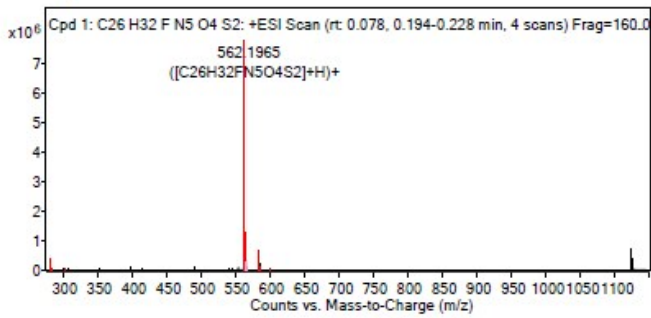

MS Spectrum Peak List

| m/z       | Calc m/z  | Diff(ppm) | z | Abund      | Formula                                                                                   | Ion                 |
|-----------|-----------|-----------|---|------------|-------------------------------------------------------------------------------------------|---------------------|
| 562.1965  | 562.1963  | -2.27     | 1 | 7967880.29 | C <sub>26</sub> H <sub>32</sub> F <sub>N</sub> <sub>5</sub> O <sub>4</sub> S <sub>2</sub> | (M+H) <sup>+</sup>  |
| 584.1791  | 584.1772  | -3.31     | 1 | 642395.72  | C <sub>26</sub> H <sub>32</sub> F <sub>N</sub> <sub>5</sub> O <sub>4</sub> S <sub>2</sub> | (M+Na) <sup>+</sup> |
| 1123.3862 | 1123.3832 | -2.61     | 1 | 746551.3   | C <sub>26</sub> H <sub>32</sub> F <sub>N</sub> <sub>5</sub> O <sub>4</sub> S <sub>2</sub> | (2M+H) <sup>+</sup> |

## Compound 11

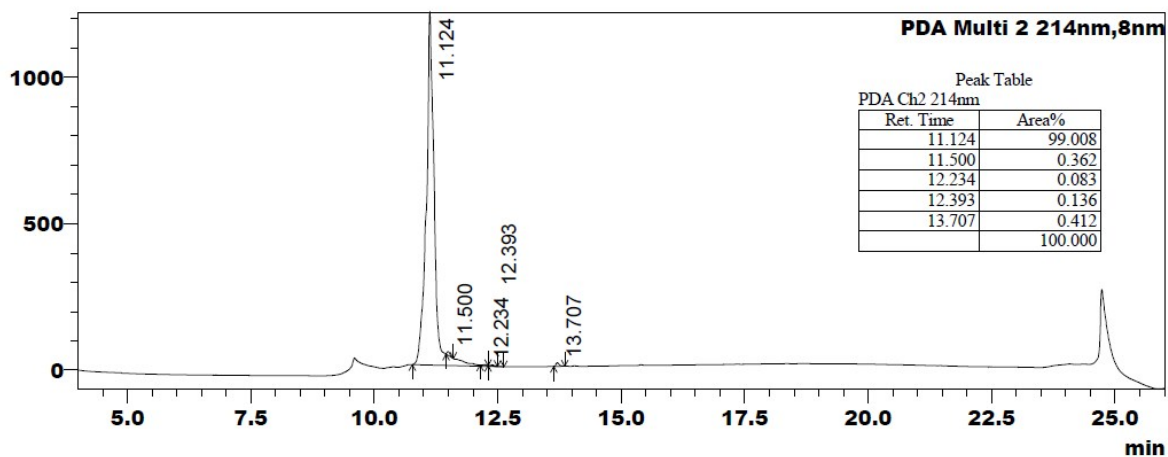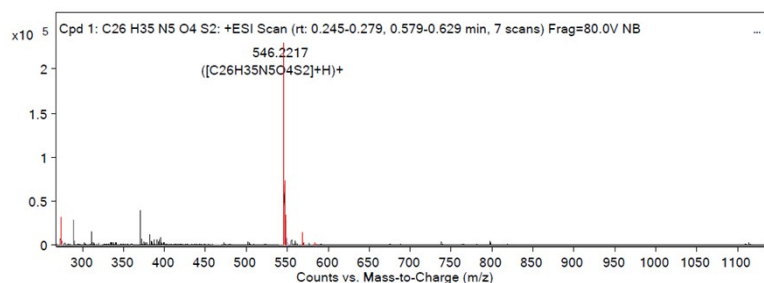

### MS Spectrum Peak List

| m/z      | Calc m/z | Diff(ppm) | z | Abund     | Formula                                                                      | Ion                  |
|----------|----------|-----------|---|-----------|------------------------------------------------------------------------------|----------------------|
| 273.6144 | 273.6138 | -2.35     | 2 | 31473.86  | C <sub>26</sub> H <sub>35</sub> N <sub>5</sub> O <sub>4</sub> S <sub>2</sub> | (M+2H) <sup>+2</sup> |
| 546.2217 | 546.2203 | -2.44     | 1 | 230770.49 | C <sub>26</sub> H <sub>35</sub> N <sub>5</sub> O <sub>4</sub> S <sub>2</sub> | (M+H) <sup>+</sup>   |
| 568.2023 | 568.2023 | -0.05     | 1 | 13925.4   | C <sub>26</sub> H <sub>35</sub> N <sub>5</sub> O <sub>4</sub> S <sub>2</sub> | (M+Na) <sup>+</sup>  |

## Compound 12

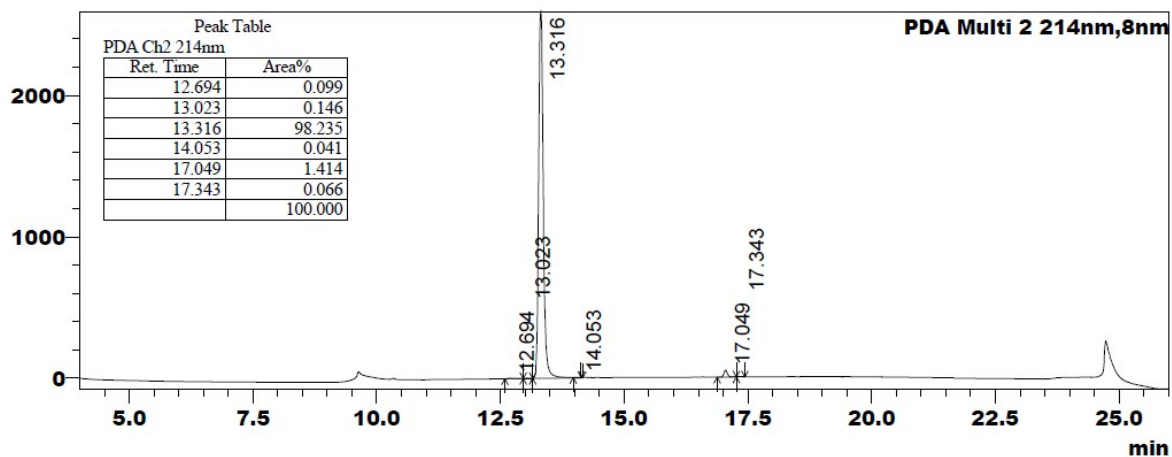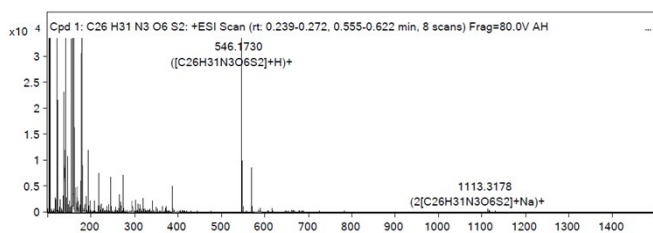

**MS Spectrum Peak List**

| m/z      | Calc m/z | Diff(ppm) | z | Abund   | Formula                                                                      | Ion                 |
|----------|----------|-----------|---|---------|------------------------------------------------------------------------------|---------------------|
| 546.173  | 546.1727 | -0.63     | 1 | 33867.7 | C <sub>26</sub> H <sub>31</sub> N <sub>3</sub> O <sub>6</sub> S <sub>2</sub> | (M+H) <sup>+</sup>  |
| 568.1541 | 568.1546 | 0.92      | 1 | 8447.67 | C <sub>26</sub> H <sub>31</sub> N <sub>3</sub> O <sub>6</sub> S <sub>2</sub> | (M+Na) <sup>+</sup> |
| 584.1297 | 584.1286 | -1.99     | 1 | 540.21  | C <sub>26</sub> H <sub>31</sub> N <sub>3</sub> O <sub>6</sub> S <sub>2</sub> | (M+K) <sup>+</sup>  |

**Compound 13**

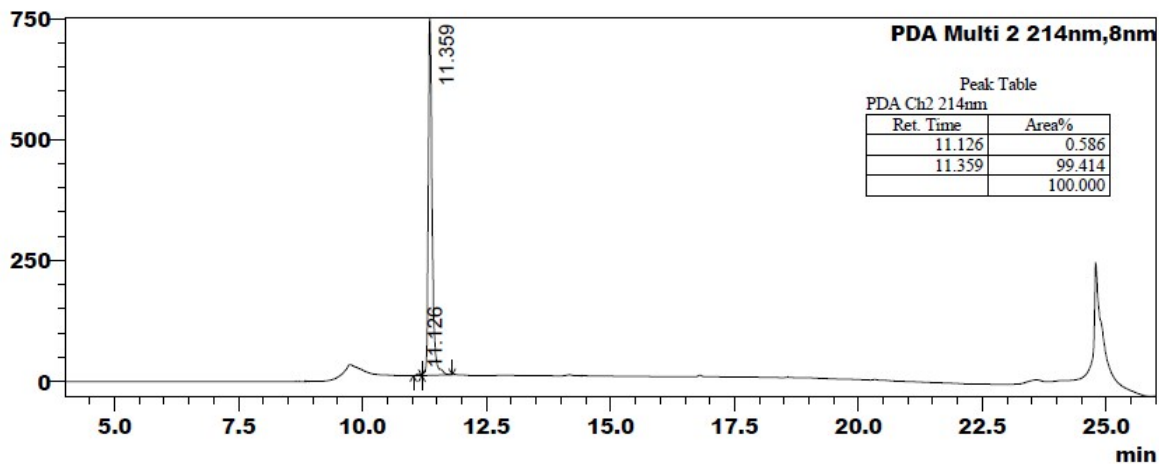

**MS Spectrum**

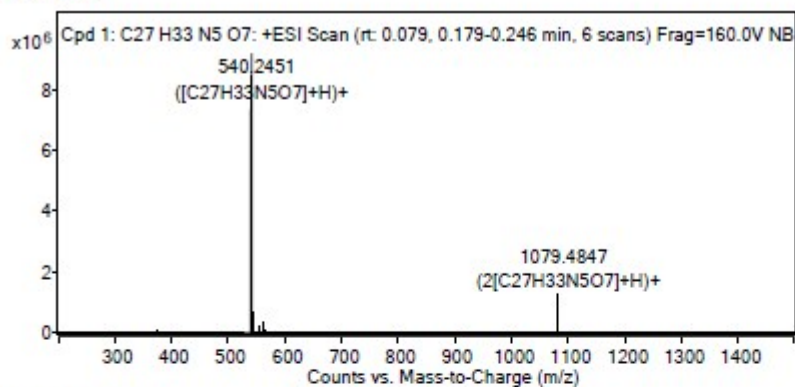

**MS Zoomed Spectrum**

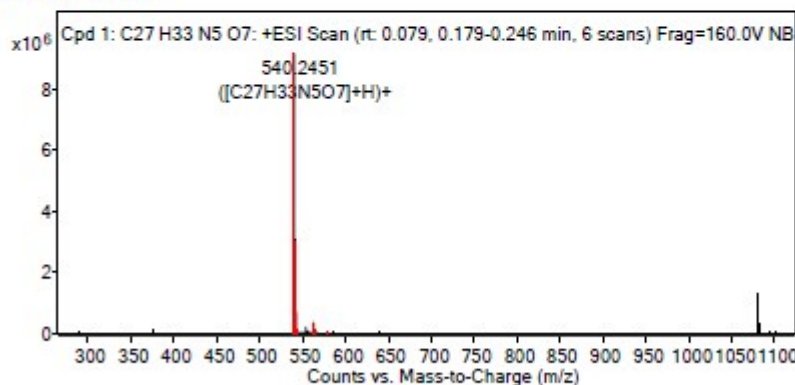

**MS Spectrum Peak List**

| m/z       | Calc m/z  | Diff(ppm) | z | Abund      | Formula                                                       | Ion                 |
|-----------|-----------|-----------|---|------------|---------------------------------------------------------------|---------------------|
| 540.2451  | 540.2453  | 0.26      | 1 | 9333305.53 | C <sub>27</sub> H <sub>33</sub> N <sub>5</sub> O <sub>7</sub> | (M+H) <sup>+</sup>  |
| 562.2267  | 562.2272  | 0.85      | 1 | 327982.65  | C <sub>27</sub> H <sub>33</sub> N <sub>5</sub> O <sub>7</sub> | (M+Na) <sup>+</sup> |
| 1079.4847 | 1079.4833 | -1.34     | 1 | 1290468.76 | C <sub>27</sub> H <sub>33</sub> N <sub>5</sub> O <sub>7</sub> | (2M+H) <sup>+</sup> |

Compound 14

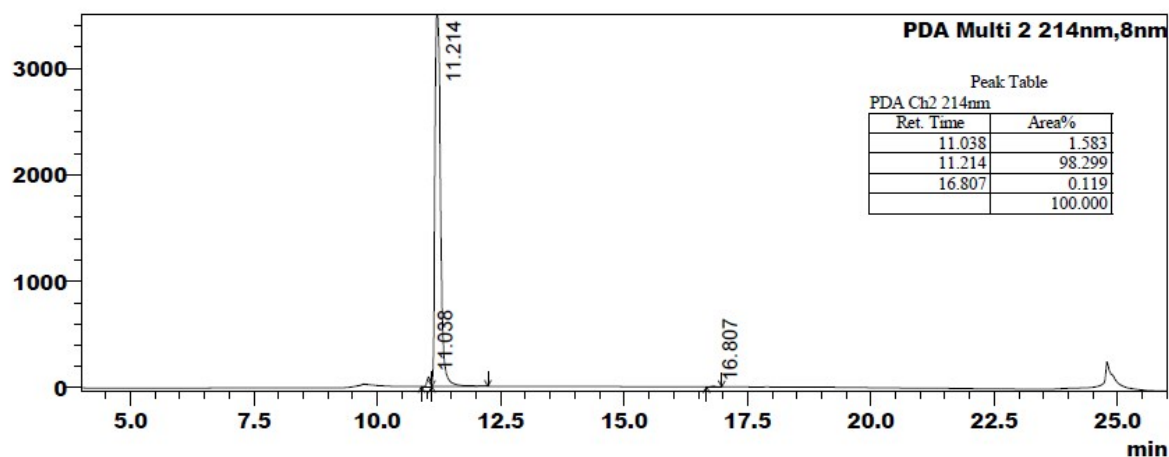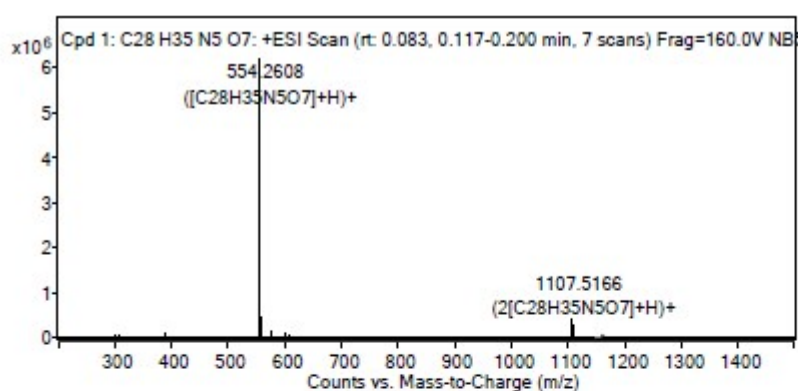

MS Zoomed Spectrum

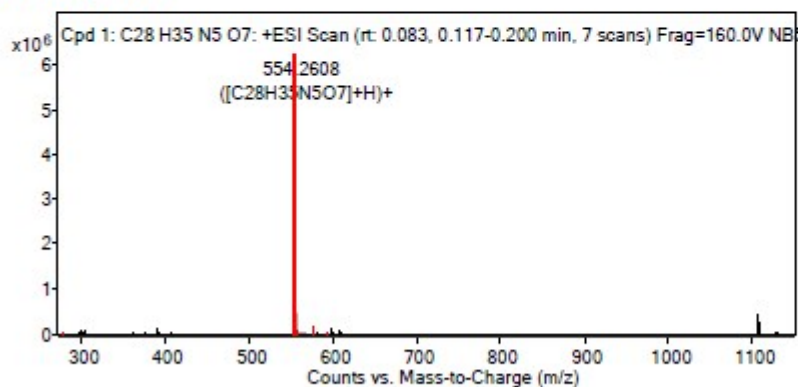

MS Spectrum Peak List

| m/z       | Calc m/z  | Diff (ppm) | z | Abund      | Formula                                                       | Ion                 |
|-----------|-----------|------------|---|------------|---------------------------------------------------------------|---------------------|
| 554.2608  | 554.2609  | 0.25       | 1 | 6260421.75 | C <sub>28</sub> H <sub>35</sub> N <sub>5</sub> O <sub>7</sub> | (M+H) <sup>+</sup>  |
| 576.242   | 576.2429  | 1.55       | 1 | 153497.4   | C <sub>28</sub> H <sub>35</sub> N <sub>5</sub> O <sub>7</sub> | (M+Na) <sup>+</sup> |
| 1107.5166 | 1107.5146 | -1.82      | 1 | 406200.01  | C <sub>28</sub> H <sub>35</sub> N <sub>5</sub> O <sub>7</sub> | (2M+H) <sup>+</sup> |

# Compound 15

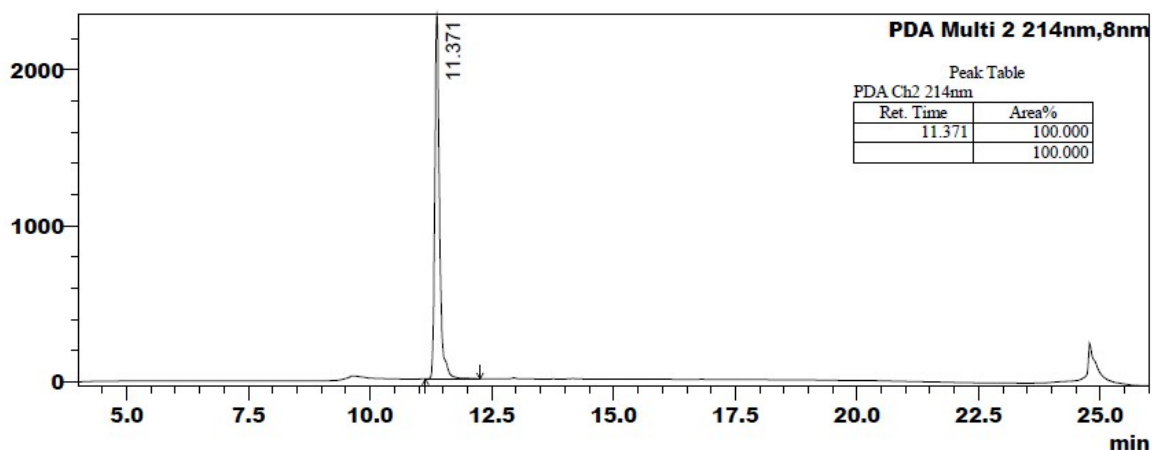

## MS Spectrum

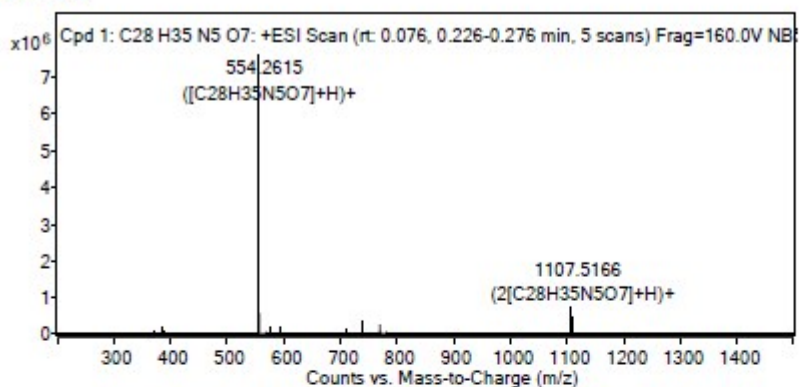

## MS Zoomed Spectrum

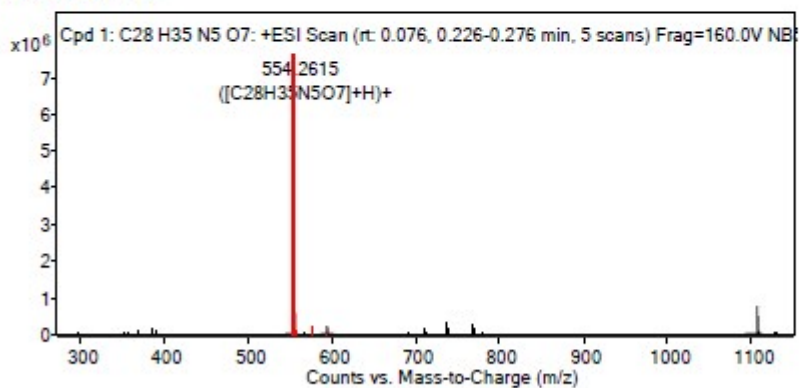

## MS Spectrum Peak List

| m/z       | Calc m/z  | Diff(ppm) | z | Abund      | Formula                                                       | Ion                 |
|-----------|-----------|-----------|---|------------|---------------------------------------------------------------|---------------------|
| 554.2615  | 554.2609  | -1.03     | 1 | 7685119.87 | C <sub>28</sub> H <sub>35</sub> N <sub>5</sub> O <sub>7</sub> | (M+H) <sup>+</sup>  |
| 576.243   | 576.2429  | -0.15     | 1 | 203790.19  | C <sub>28</sub> H <sub>35</sub> N <sub>5</sub> O <sub>7</sub> | (M+Na) <sup>+</sup> |
| 1107.5166 | 1107.5146 | -1.85     | 1 | 760350     | C <sub>28</sub> H <sub>35</sub> N <sub>5</sub> O <sub>7</sub> | (2M+H) <sup>+</sup> |
